# Supplementary material for: Functional covalent organic framework H2S sensors for periodontitis monitoring and antibacterial treatment
Source: Royal Society of Chemistry journal article supplement (doi:10.1039/d4nj05111d), 2025-01-01
Supplement: d4nj05111d1.pdf [file d4nj05111d1.pdf]

Electronic Supplementary Material (ESI) for New Journal of Chemistry.  
This journal is © The Royal Society of Chemistry 2024

## Supplementary Information

### **Functional covalent organic framework H<sub>2</sub>S sensor for periodontitis monitoring and antibacterial treatment**

Chenkai Chu,<sup>a</sup> Xiao Lian,<sup>bc</sup> Qian Zheng,<sup>a</sup> Yongxin Tao,<sup>\*a</sup> Yong Qin<sup>\*a</sup> and Jinmin Wang<sup>\*ab</sup>

<sup>a</sup> School of Petrochemical Engineering, Changzhou University, Changzhou 213164, China

<sup>b</sup> Jiangsu Key Laboratory of Advanced Manufacturing for High-end Chemicals, Changzhou University, Changzhou 213164, China

<sup>c</sup> Key Laboratory of Functional Inorganic Materials of Anhui Province, Key Laboratory of Structure and Functional Regulation of Hybrid Materials of Ministry of Education, School of Chemistry & Chemical Engineering, Anhui University, Hefei 230601, China

\* Corresponding author: Yongxin Tao, Email: taoyx@cczu.edu.cn;

Yong Qin, Email: qinyong@cczu.edu.cn;

Jinmin Wang, Email: wjm@cczu.edu.cn

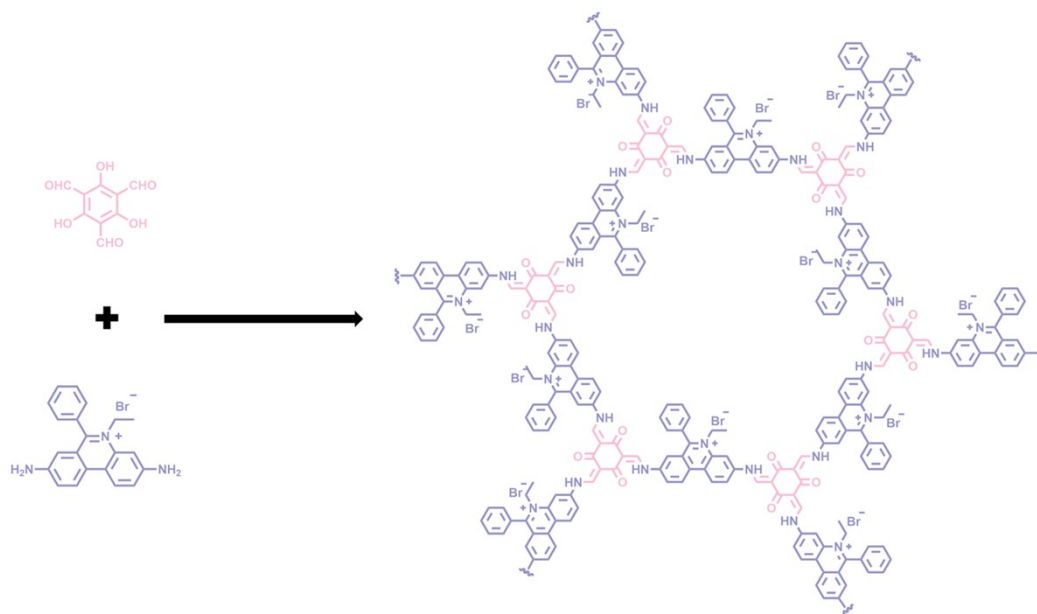

**Scheme S1** Schematic representation for synthesis EB-TFP.

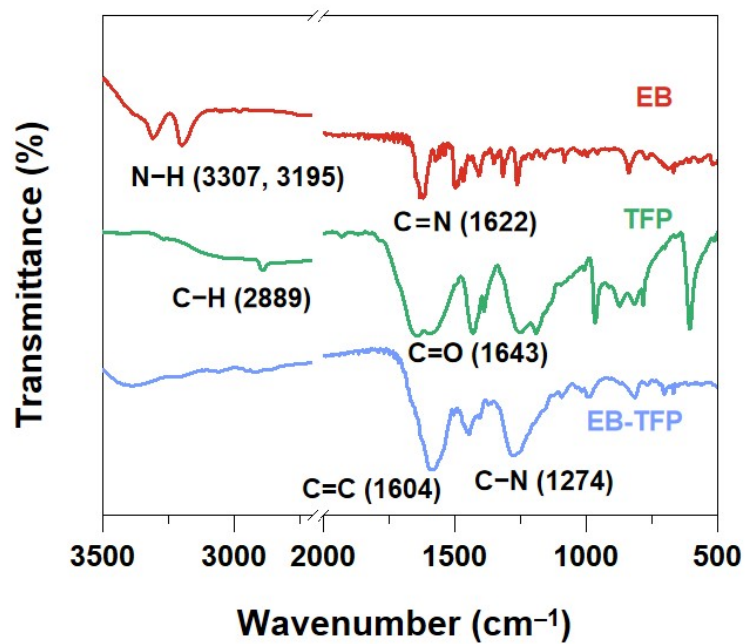

**Fig. S1** FTIR analysis of EB-TFP and its raw materials (TFP and EB).

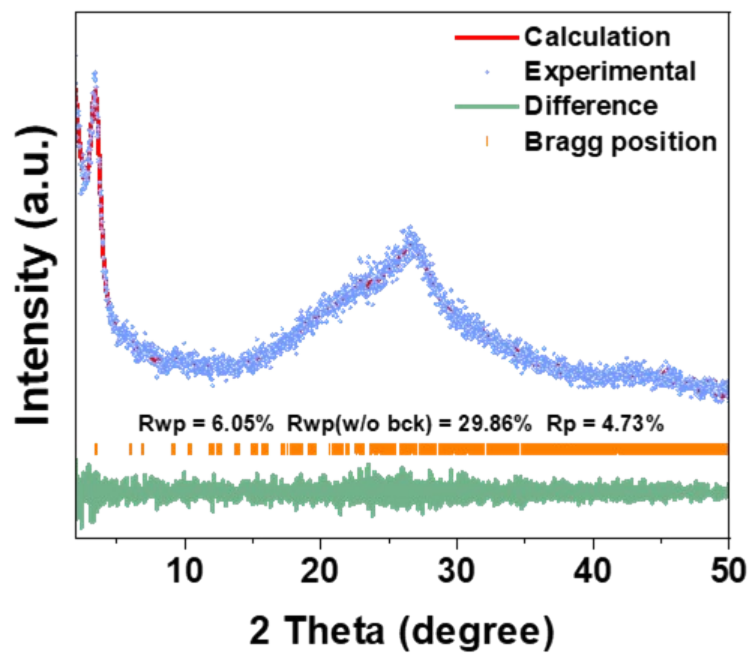

**Fig. S2** PXR D profiles of EB-TFP: the experimental pattern (blue), the Pawley refined pattern (red), the Bragg positions (orange), and the refinement differences (green).

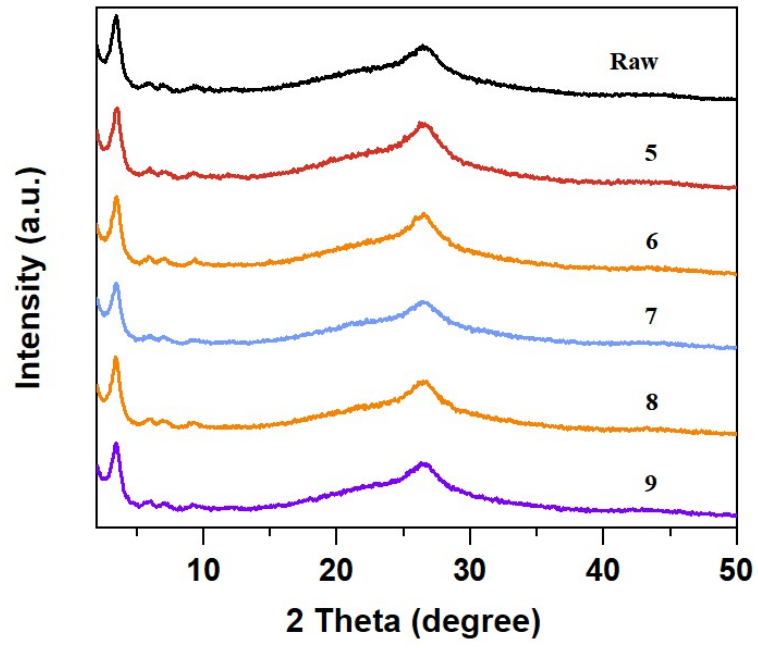

**Fig. S3** PXRD of EB-TFP@PB soaked in different pH solutions.

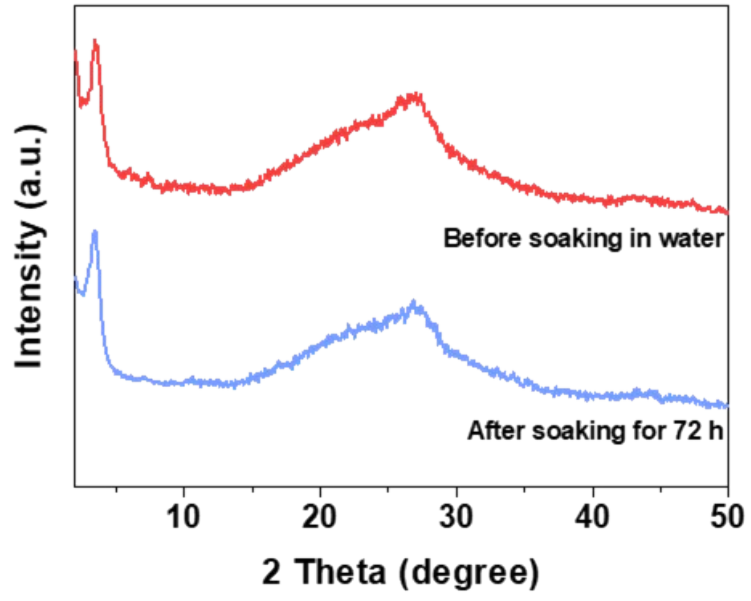

**Fig. S4** PXRD pattern of EB-TFP@PB before and after soaking in water.

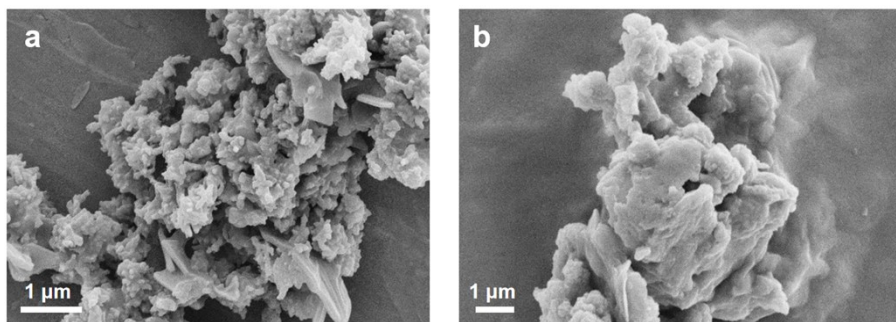

**Fig. S5** SEM images of EB-TFP (a) and EB-TFP@PB (b)

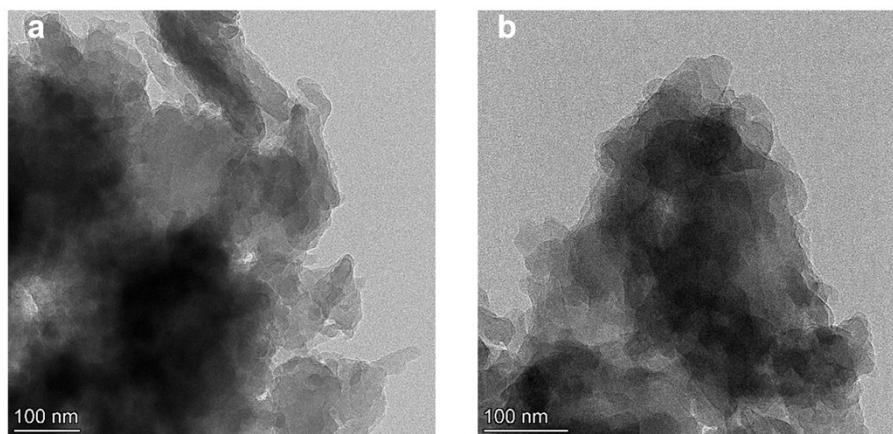

**Fig. S6** TEM images of EB-TFP (a) and EB-TFP@PB (b).



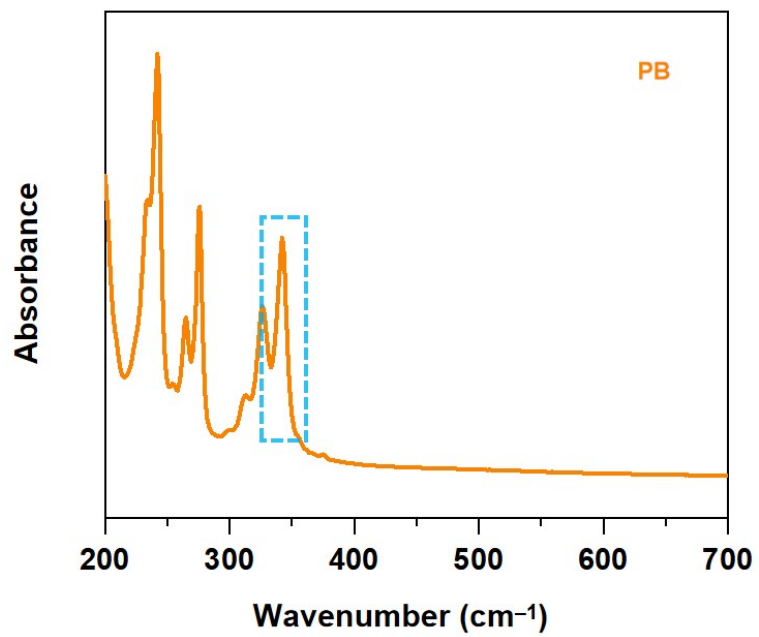

**Fig. S7** UV-Vis absorption spectrum of PB in aqueous solution.

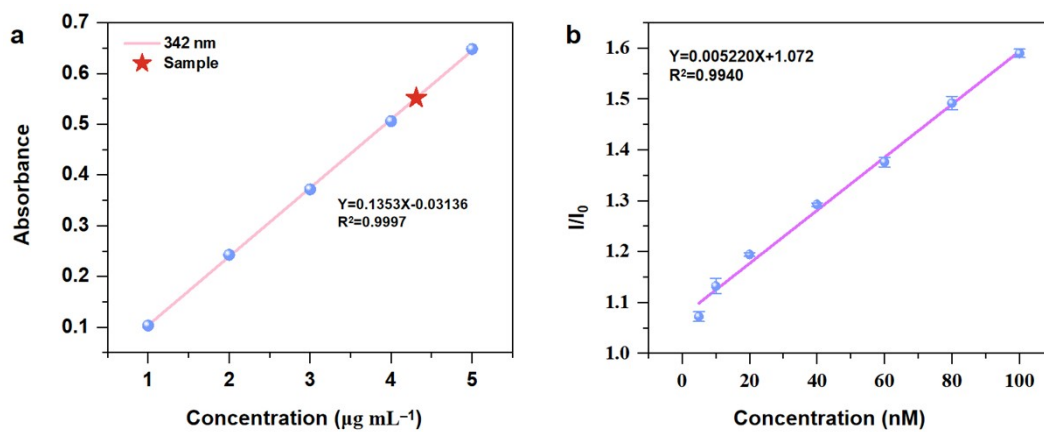

**Fig. S8** (a) Concentration-dependent absorbance of PB and PB in the supernatant after preparing EB-TFP@PB. (b) Calibration curves of EB-TFP@PB in the presence of 0–100 nM  $\text{H}_2\text{S}$ .

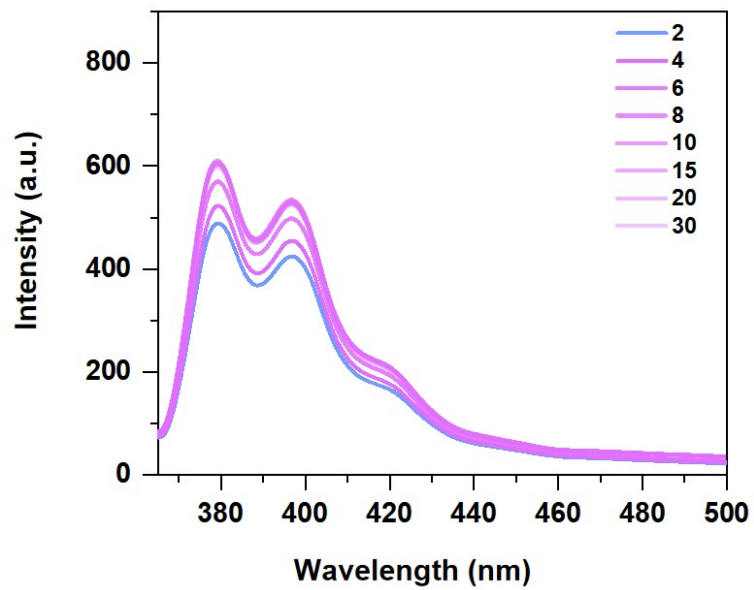

**Fig. S9** Emission spectra of EB-TFP@PB with different incubation time (2-60 min).

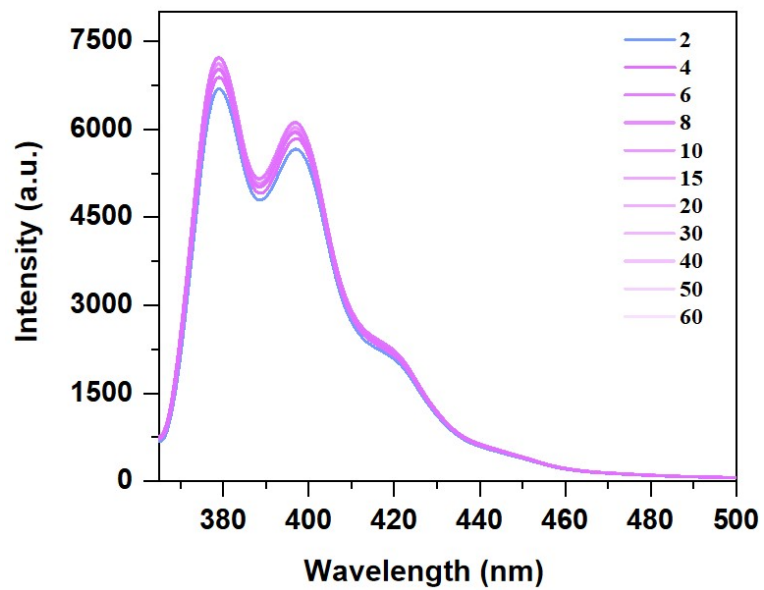

**Fig. S10** Emission spectra of EB-TFP@PB added  $H_2S$  ( $10^{-4}$  M) with different incubation time (2-60 min).

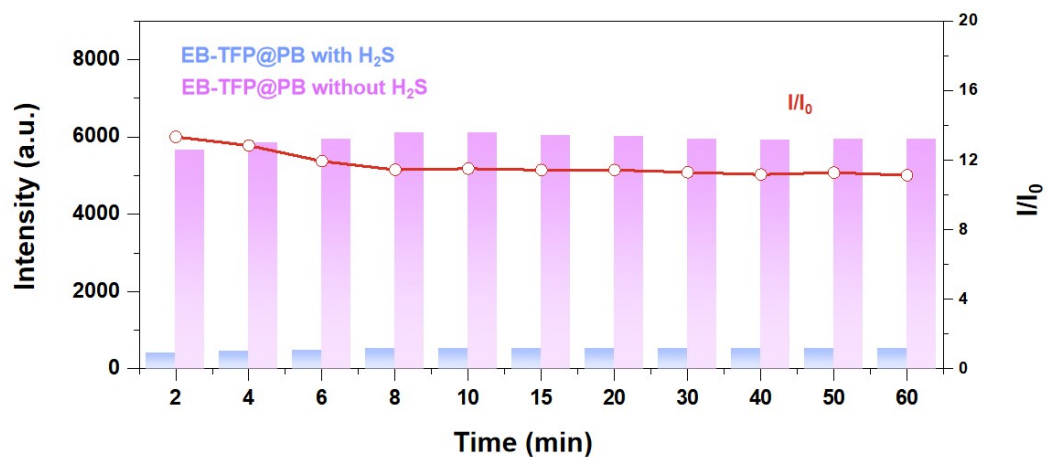

**Fig. S11** Fluorescence intensity of EB-TFP@PB with and without H<sub>2</sub>S (10<sup>-4</sup> M) with different incubation time, and the fluorescence enhancement factor under corresponding conditions.

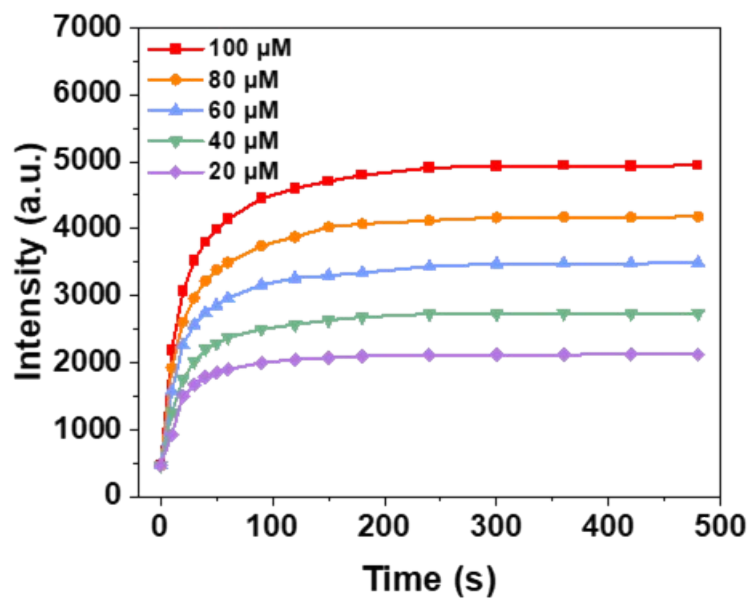

**Fig. S12** The variation of fluorescence intensity with time at different concentrations.

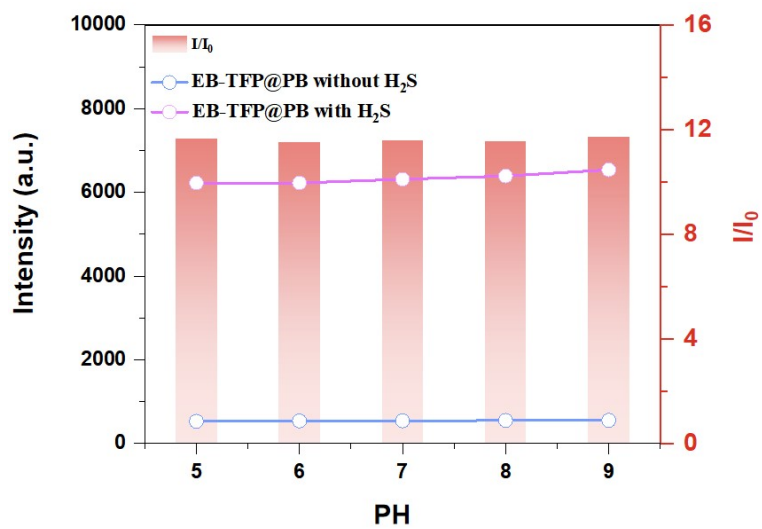

**Fig. S13** Fluorescence intensity of EB-TFP@PB with and without H<sub>2</sub>S (10<sup>-4</sup> M) with different pH solutions, and the fluorescence enhancement factor under corresponding conditions.

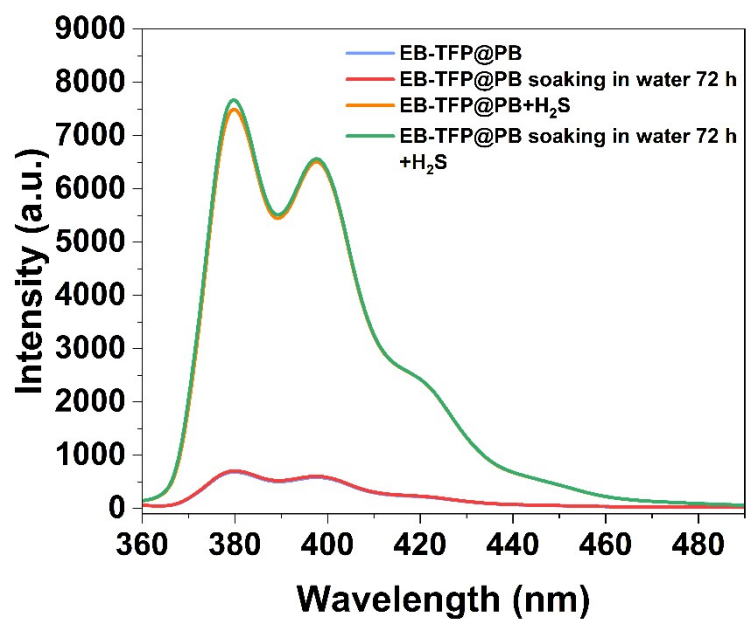

**Fig. S14** Fluorescence intensity of EB-TFP@PB before and after soaking in water.



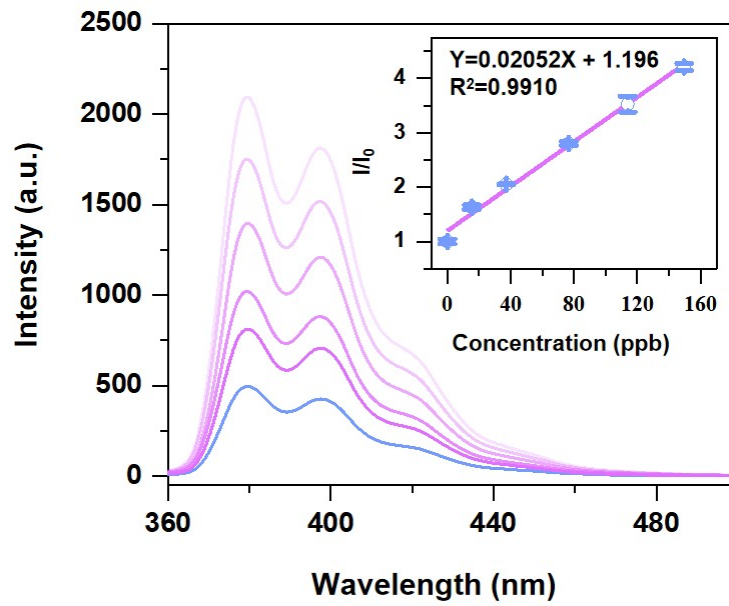

**Fig. S15** Fluorescence spectra of EB-TFP@PB sensing H<sub>2</sub>S gas with different concentrations (0–160 ppb).

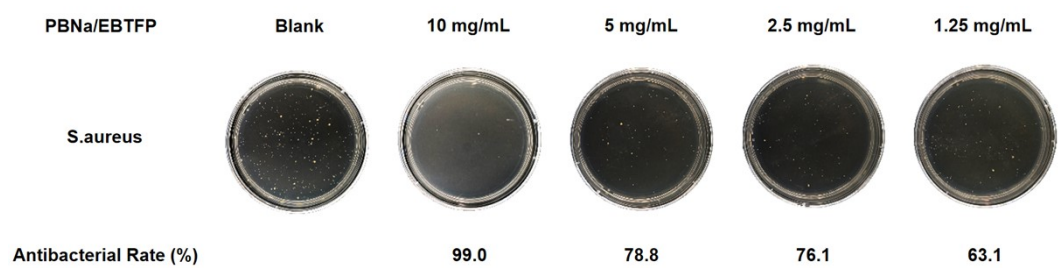

**Fig. S16** Antibacterial rate of EB-TFP@PB with different concentrations against *S. aureus*.

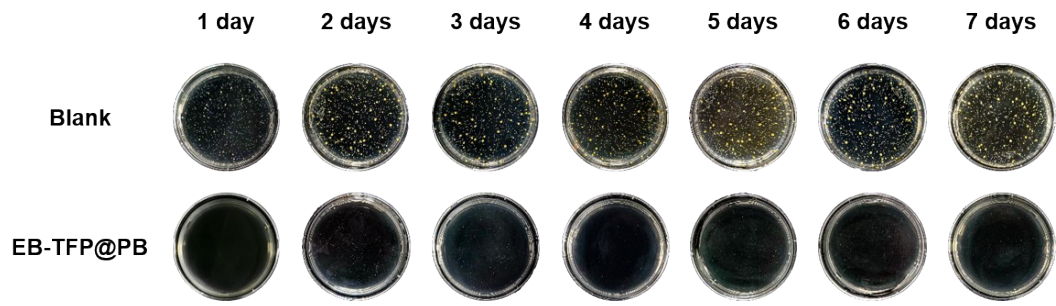

**Fig. S17** The long-term antibacterial experiment of EB-TFP@PB.

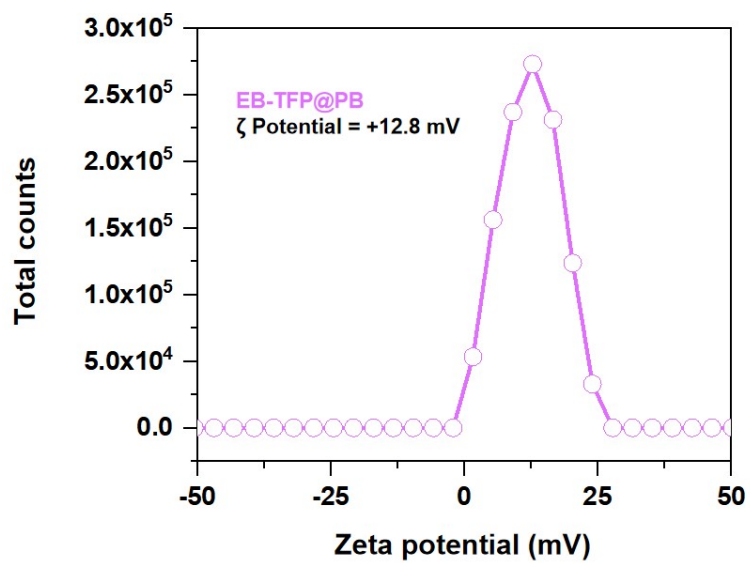

**Fig. S18**  $\zeta$ -Potential analysis of EB-TFP@PB in aqueous solution.

**Table S1** The mass percentage of all elements in EB-TFP@PB determined by XPS.

| <b>Element</b> | <b>Percentage by mass</b> |
|----------------|---------------------------|
| <b>C</b>       | 78.86                     |
| <b>N</b>       | 8.13                      |
| <b>O</b>       | 12.00                     |
| <b>Na</b>      | 1.01                      |
